# Supplementary material for: Outcomes after late bone marrow and very early central nervous system relapse of childhood B-acute lymphoblastic leukemia: a report from the Children’s Oncology Group phase III study AALL0433
Source: PubMed Central journal article supplement — Haematologica. 2020 Jan 30;106(1):46–55. doi: 10.3324/haematol.2019.237230 (PMC7776266; doi:10.3324/haematol.2019.237230), 2020-01-30
Supplement: 2019_237230_LEW_SUPPL.pdf [file 2019_237230_LEW_SUPPL.pdf]

# Outcomes after late bone marrow and very early central nervous system relapse of childhood B-acute lymphoblastic leukemia: a report from the Children's Oncology Group phase III study AALL0433

Glen Lew,<sup>1</sup> Yichen Chen,<sup>2</sup> Xiaomin Lu,<sup>3</sup> Susan R. Rheingold,<sup>4</sup> James A. Whitlock,<sup>5</sup> Meenakshi Devidas,<sup>2</sup> Caroline A. Hastings,<sup>6</sup> Naomi J. Winick,<sup>7</sup> William L. Carroll,<sup>8</sup> Brent L. Wood,<sup>9</sup> Michael J. Borowitz,<sup>10</sup> Michael A. Pulsipher<sup>11#</sup> and Stephen P. Hunger<sup>4#</sup>

<sup>1</sup>Aflac Cancer & Blood Disorders Center, Children's Healthcare of Atlanta, Department of Pediatrics, Emory University School of Medicine, Atlanta, GA, USA; <sup>2</sup>Department of Global Pediatric Medicine, St Jude Children's Research Hospital, Memphis, TN, USA; <sup>3</sup>Gilead Sciences, Inc., Foster City, CA, USA; <sup>4</sup>Department of Pediatrics and the Center for Childhood Cancer Research, Children's Hospital of Philadelphia and the Perelman School of Medicine at the University of Pennsylvania, Philadelphia, PA, USA; <sup>5</sup>Division of Hematology/Oncology, Department of Pediatrics, The Hospital for Sick Children, University of Toronto, Toronto, Ontario, Canada; <sup>6</sup>UCSF Benioff Children's Hospital Oakland, Oakland, CA, USA; <sup>7</sup>University of Texas Southwestern Medical Center, Dallas, TX, USA; <sup>8</sup>Perlmutter Cancer Center and Department of Pediatrics, NYU Langone Medical Center, New York, NY, USA; <sup>9</sup>Department of Laboratory Medicine, University of Washington, Seattle, WA, USA; <sup>10</sup>Department of Pathology, Johns Hopkins Medical Institutions, Baltimore, MD, USA and <sup>11</sup>Division of Hematology, Oncology, and Blood and Marrow Transplantation, Children's Hospital Los Angeles, USC Keck School of Medicine, Los Angeles, CA, USA

*#MAP and SPH contributed equally as co-senior authors.*

©2021 Ferrata Storti Foundation. This is an open-access paper. doi:10.3324/haematol.2019.237230

Received: September 3, 2019.

Accepted: January 24, 2020.

Pre-published: January 30, 2020.

Correspondence: GLEN LEW - glen.lew@choa.org

---

## Supplemental Data

### Supplemental Figure Legends

**Figure S1 Panel A & B:** Event-free survival (EFS) and Overall survival (OS) curves by minimal residual disease (MRD) range after induction-1, for late marrow relapse patients on standard arm (Arm A), with available MRD data (p-values < 0.0001). **Panel C & D:** EFS and OS curves by 0.1% MRD threshold after induction-1 for late marrow relapse patients on standard arm (Arm A), with available MRD data. The 3-year EFS and OS were  $85.1 \pm 4.6\%$  and  $95.1 \pm 2.8\%$  for patients with MRD <0.1%, and  $37.5 \pm 17.1\%$  and  $50.0 \pm 17.7\%$  for patients with MRD  $\geq 0.1\%$  (both p-values < 0.0001).

**Figure S2** Adjusted Disease-free survival (DFS) and Overall survival (OS) curves by hematopoietic cell transplantation (HCT) donor type for late marrow relapse patients. The 3-year adjusted DFS and OS were  $73.7 \pm 7.0\%$  and  $80.9 \pm 6.3\%$  for matched sibling donor, and  $72.0 \pm 9.2\%$  and  $72.0 \pm 9.2\%$  for other donors (p-values: 0.65 and 0.67).

**Figure S3** Adjusted Disease-free survival (DFS) and Overall survival (OS) curves by hematopoietic cell transplantation (HCT) vs. chemotherapy alone for patients with isolated CNS relapse. The 3-year adjusted DFS and OS were  $71.4\% \pm 17.0\%$  and  $71.4 \pm 17.1\%$  for HCT, and  $28.6\% \pm 9.9\%$  and  $42.9 \pm 10.8\%$  for chemotherapy alone (p-values: 0.12 and 0.18).

**Figure S4** Event-free survival (EFS) and Overall survival (OS) curves by Vincristine randomization for late marrow patients. The 3-year EFS and OS were  $70.1\% \pm 3.5\%$  and  $78.6\% \pm 3.1\%$  for Arm A, and  $55.1\% \pm 6.5\%$  and  $63.6\% \pm 6.3\%$  for Arm B, (p-values = 0.09 and 0.07).

Figure S1

A

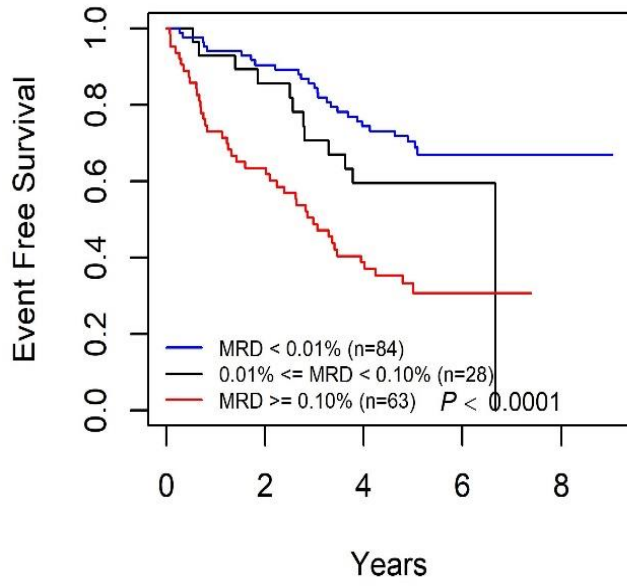

B

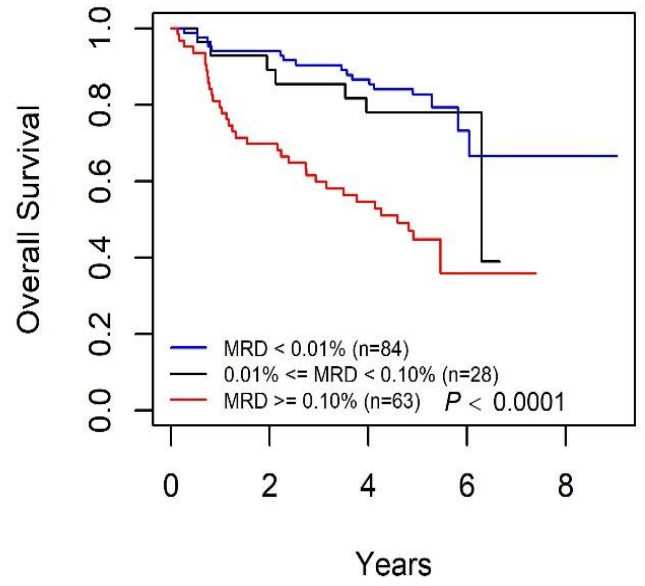

C

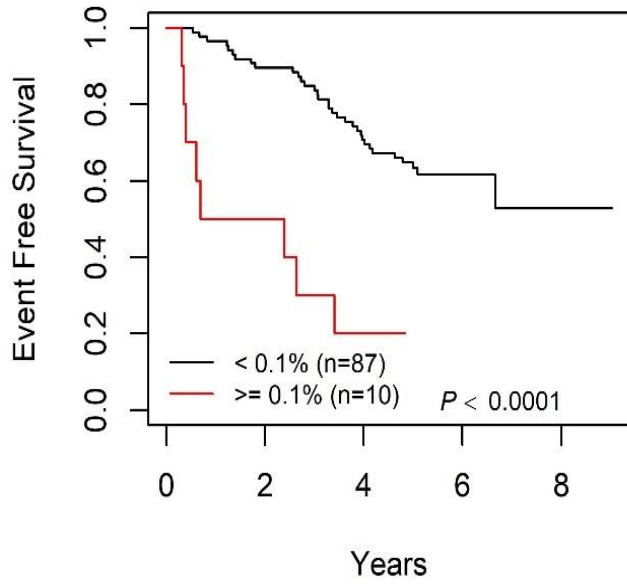

D

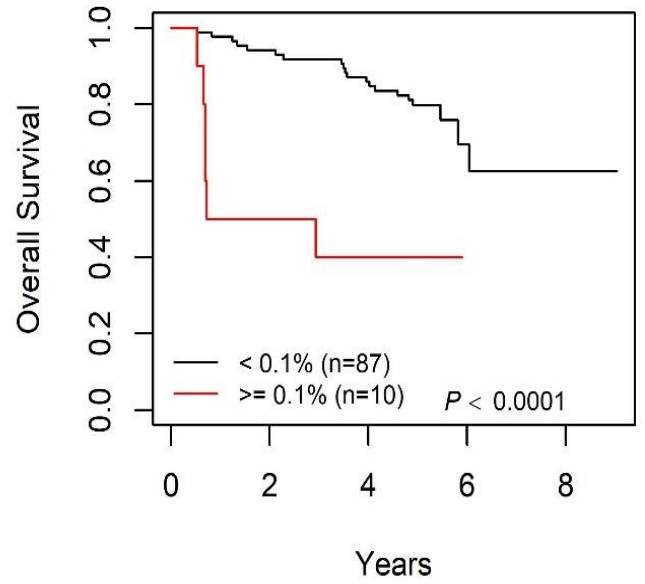

Figure S2

**A**

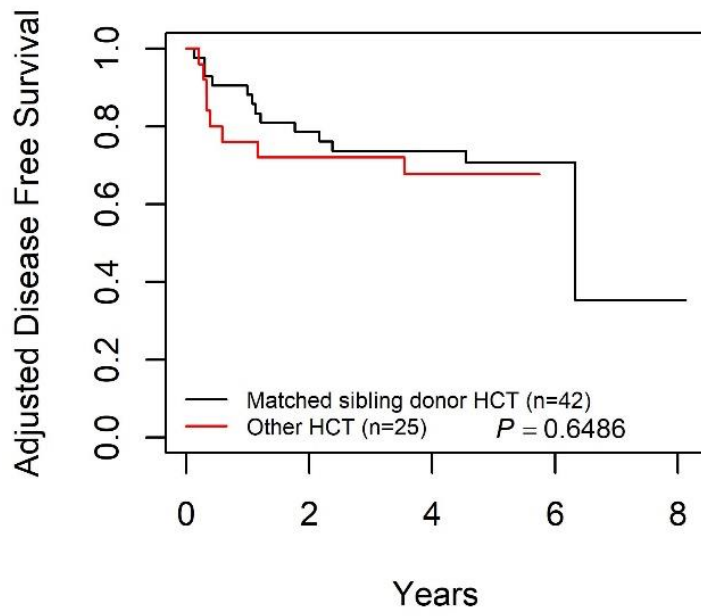

**B**

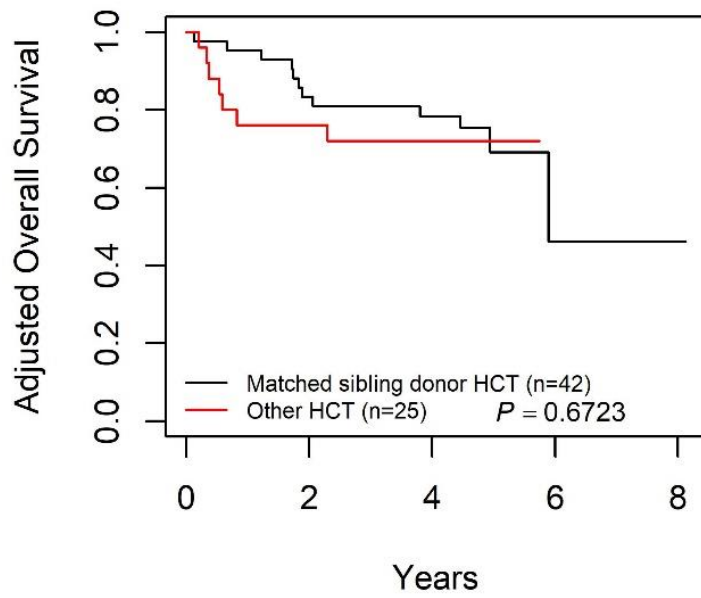

**Figure S3**

**A**

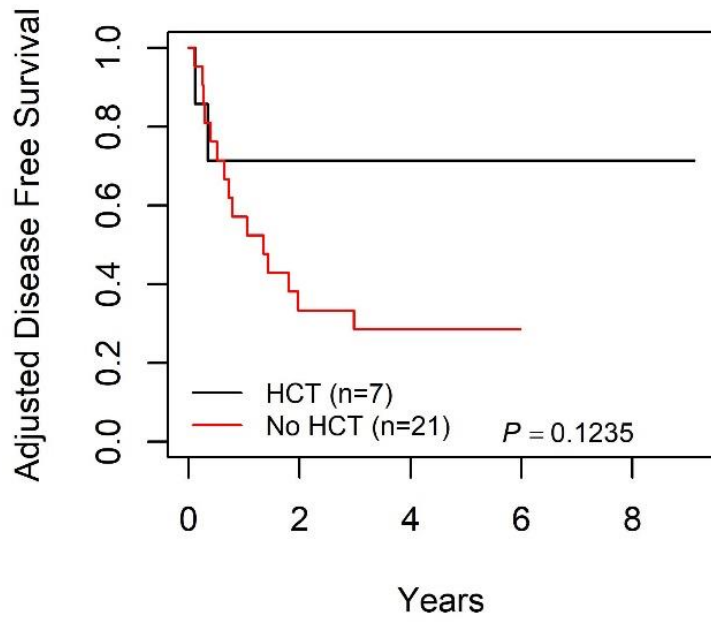

**B**

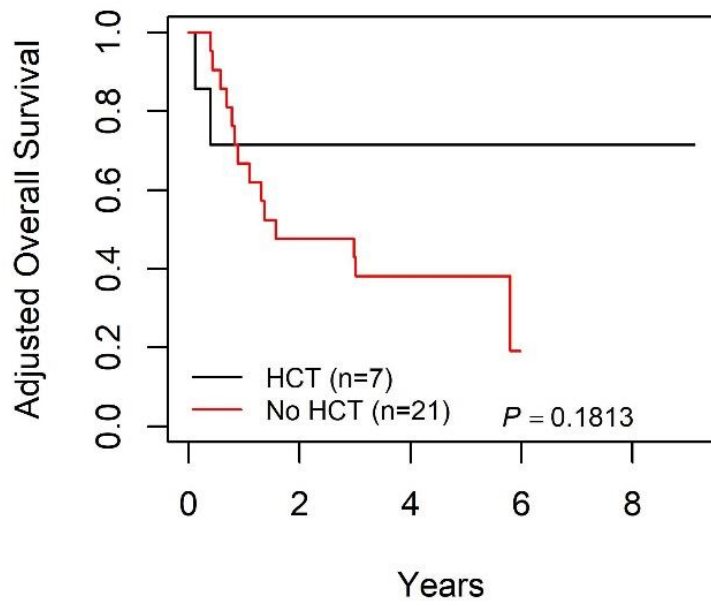

**Figure S4**

**A**

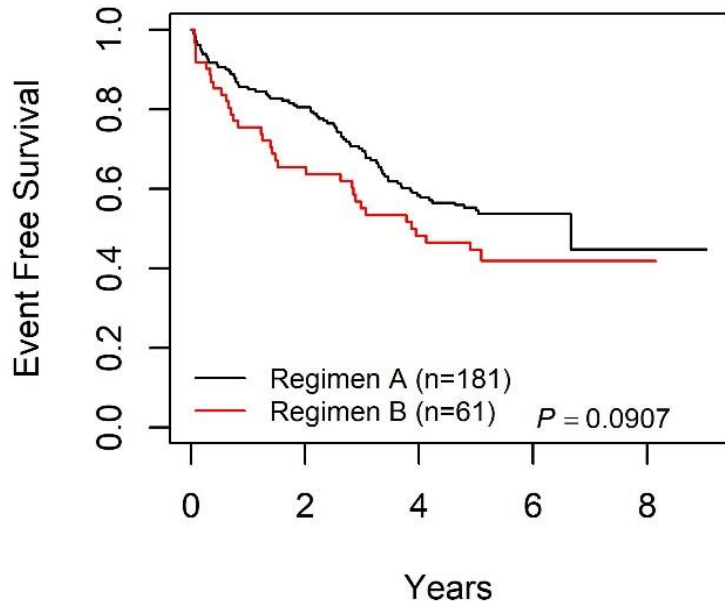

**B**

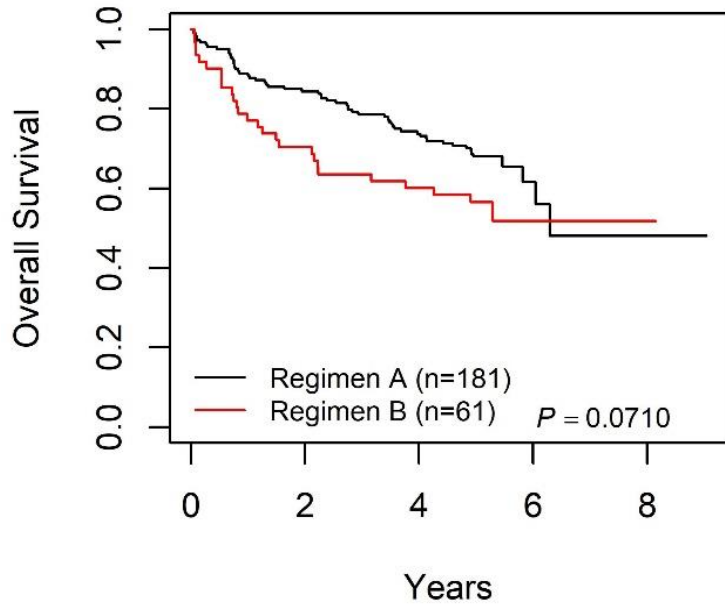

**Table S1** – Chemotherapy Details

**INDUCTION 1:**

| Week           | 1                 | 2    | 3    | 4    | 5    |
|----------------|-------------------|------|------|------|------|
| PRED           | X.....            |      |      |      |      |
| VCR            | X                 | X    | X    | X    |      |
| PEG-ASP        | X                 | X    | X    | X    |      |
| DOXO           | X                 |      |      |      |      |
| IT ARAC/IT MTX | X <sup>AraC</sup> |      | X    |      | X    |
| (ITT)*         | (X)*              | (X)* | (X)* | (X)* | (X)* |

Weeks 1-5:

Prednisone – 40 mg/m<sup>2</sup>/day PO divided TID x 28 days  
**Vincristine – 1.5 mg/m<sup>2</sup> (max 2 mg) vs. 2 mg/m<sup>2</sup> (max 2.5 mg) IV**  
Pegaspargase – 2500 units/m<sup>2</sup> IM  
Doxorubicin – 60 mg/m<sup>2</sup> IV  
Intrathecal ARAC – (dose by age) for CNS-negative ONLY on Day 1 only  
Intrathecal Methotrexate – (dose by age) for CNS-negative ONLY on Days 15, 29  
\*Intrathecal Triples (MTX/HC/ARAC) for CNS-positive ONLY Days 1, 8, 15, 22, 29

**INDUCTION 2:** \*(CNS-positive patients receive INDUCTION 3 before INDUCTION 2)

| Week            | 6       | 7      | 8 | 9 | 10 |
|-----------------|---------|--------|---|---|----|
| CPM             | XXXXX   |        |   |   |    |
| ETOP            | XXXXX   |        |   |   |    |
| G-CSF           |         | X..... |   |   |    |
| HD MTX/LEUC     |         |        |   | X |    |
| IT MTX (ITT)*   | X       |        |   | X |    |
| ^Testicular XRT | (^X...) |        |   |   |    |

Weeks 6-10:

Cyclophosphamide – 440 mg/m<sup>2</sup>/day IV x 5 days  
Etoposide – 100 mg/m<sup>2</sup>/day IV x 5 days  
GCSF – 5 mcg/kg/day SubQ/IV. daily  
Methotrexate – 5 grams/m<sup>2</sup> IV over 24 hours  
Leucovorin – 15 mg/m<sup>2</sup> IV/PO q6 hrs x min. 3 doses starting @ hr 42  
Intrathecal MTX – dose by age \*(ITT for CNS-positive only)  
^Testicular Relapse with Persistent Disease: XRT – 2400 cGy to be completed prior to HDMTX

**INDUCTION 3:** \*(CNS-positive patients receive INDUCTION 3 before INDUCTION 2)

| Week    | 11   | 12   | 13     | 14 | 15 |
|---------|------|------|--------|----|----|
| HD ARAC | XXXX | XXXX |        |    |    |
| L-ASP   | X    | X    |        |    |    |
| G-CSF   |      |      | X..... |    |    |

Weeks 11-15:

Cytarabine – 3000 mg/m<sup>2</sup> IV q12 hrs x 4 doses  
*E. coli* asparaginase – 6000 International units/m<sup>2</sup> IM  
GCSF – 5 mcg/kg SubQ/IV daily

**INTENSIFICATION 1:** (for those without a matched family donor for SCT)

| Week          | 16    | 17 | 18    | 19 | 20 | 21    | 22 | 23 | 24    | 25 |
|---------------|-------|----|-------|----|----|-------|----|----|-------|----|
| 26            |       |    |       |    |    |       |    |    |       |    |
| 27            |       |    |       |    |    |       |    |    |       |    |
| HD MTX/LEUC   | X     |    | X     |    |    | X     |    |    | X     |    |
| MP            | X.... |    | X.... |    |    | X.... |    |    | X.... |    |
| VCR           | X     |    | X     |    |    | X     |    |    | X     |    |
| ETOP          | X     |    |       | X  |    |       | X  |    |       | X  |
| CPM           | X     |    |       | X  |    |       | X  |    |       | X  |
| IT MTX (ITT)* |       | X  |       |    | X  |       |    | X  |       |    |

Weeks 16-27:

Methotrexate – 5 grams/m<sup>2</sup> IV over 24 hours  
Leucovorin – 15 mg/m<sup>2</sup> IV/PO q6 hrs x min. 3 doses starting @ hr 42  
Mercaptopurine - 50 mg/m<sup>2</sup> PO daily x 5 days  
**Vincristine – 1.5 mg/m<sup>2</sup> (max 2 mg) vs. 2 mg/m<sup>2</sup> (max 2.5 mg) IV**  
Etoposide - 300 mg/m<sup>2</sup> IV  
Cyclophosphamide - 500 mg/m<sup>2</sup> IV  
Intrathecal MTX – dose by age \*(ITT for CNS-positive)

**REINDUCTION:**

| Week          | 28      | 29 | 30      | 31 | 32 |
|---------------|---------|----|---------|----|----|
| DEX           | XXXXXXX |    | XXXXXXX |    |    |
| VCR           | X       | X  | X       |    |    |
| PEG-ASP       | X       |    | X       |    |    |
| DOXO          | X       | X  | X       |    |    |
| IT MTX (ITT)* | X       |    |         | X  |    |

Weeks 28-32: Dexamethasone – 10 mg/m<sup>2</sup>/day PO divided BID days 1-7,15-21 (all ages)  
**Vincristine – 1.5 mg/m<sup>2</sup> (max 2 mg) vs. 2 mg/m<sup>2</sup> (max 2.5 mg) IV**  
Pegaspargase - 2500 International units/m<sup>2</sup> IM  
Doxorubicin - 25 mg/m<sup>2</sup> IV  
Intrathecal MTX – dose by age \*(ITT for CNS-positive)

**INTENSIFICATION 2: (6-week cycle repeated 4 times = 24 weeks)**

| Week          | 33   | 34   | 35 | 36 | 37 | 38..... | 51   | 52   | 53 | 54 | 55 |
|---------------|------|------|----|----|----|---------|------|------|----|----|----|
| 56            |      |      |    |    |    |         |      |      |    |    |    |
| HD ARAC       | XXXX |      |    |    |    |         | XXXX |      |    |    |    |
| PEG-ASP       | X    |      |    |    |    |         |      | X    |    |    |    |
| G-CSF         |      | X... |    |    |    |         |      | X... |    |    |    |
| HD MTX/LEUC   |      |      |    | X  |    |         |      |      |    | X  |    |
| MP            |      |      |    | X⑤ |    |         |      |      |    | X⑤ |    |
| VCR           |      |      |    | X  | X  |         |      |      |    | X  | X  |
| ETOP          |      |      |    |    | X  |         |      |      |    |    | X  |
| CPM           |      |      |    |    | X  |         |      |      |    |    | X  |
| IT MTX (ITT)* |      |      |    |    |    | X       |      |      |    |    |    |

Weeks 33-56: Cytarabine – 3000 mg/m<sup>2</sup> IV q12 x 4 doses  
Pegaspargase - 2500 International units/m<sup>2</sup> IM  
GCSF – 5 mcg/kg/day SubQ/IV daily  
Methotrexate – 5 grams/m<sup>2</sup> IV over 24 hours  
Leucovorin – 15 mg/m<sup>2</sup> IV/PO q6 hrs x min. 3 doses starting @ hr 42  
Mercaptopurine - 50 mg/m<sup>2</sup> PO daily x 5  
**Vincristine – 1.5 mg/m<sup>2</sup> (max 2 mg) vs. 2 mg/m<sup>2</sup> (max 2.5 mg) IV**  
Etoposide - 300 mg/m<sup>2</sup> IV  
Cyclophosphamide - 500 mg/m<sup>2</sup> IV  
Intrathecal MTX – dose by age \*(ITT for CNS-positive only)

**MAINTENANCE: (10-week cycle repeated 5 times = 50 weeks)**

| Week                | 57             | 58 | 59 | 60 | 61 | 62 | 63 | 64 | 65 | 66..... | 106 |
|---------------------|----------------|----|----|----|----|----|----|----|----|---------|-----|
| DEX                 | X....          |    |    |    |    |    |    |    |    |         |     |
| MP                  | X.....         |    |    |    |    |    |    |    |    |         |     |
| MTX                 | X*             | X  | X  | X  | X  | X  |    |    |    |         |     |
| (*CNS+ only)        |                |    |    |    |    |    |    |    |    |         |     |
| IT MTX <sup>!</sup> | X <sup>!</sup> |    |    |    |    |    |    |    |    |         |     |
| VCR                 |                |    |    |    |    |    | X  | X  | X  | X       |     |
| CPM                 |                |    |    |    |    |    | X  | X  | X  | X       |     |
| CNS XRT*            | X*...          |    |    |    |    |    |    |    |    |         |     |

Weeks 57-106: Dexamethasone – 10 mg/m<sup>2</sup>/day PO divided BID x 5 days  
**Vincristine – 1.5 mg/m<sup>2</sup> (max 2 mg) vs. 2 mg/m<sup>2</sup> (max 2.5 mg) IV**  
Cyclophosphamide – 300 mg/m<sup>2</sup> IV  
Mercaptopurine – 75 mg/m<sup>2</sup> PO nightly  
Methotrexate – 40 mg/m<sup>2</sup> PO qWk except on weeks of IT MTX \*(give for CNS-pos)  
! CNS-negative only: Intrathecal MTX – dose by age q10 weeks  
\* CNS-positive only: Cranial Radiation – 1800 cGy at beginning of Maintenance Cycle 1

**Table S2 – Deaths due to toxicity**



| <b>Stratum</b>  | <b>Phase of Therapy</b> | <b>Reported etiology / inciting organism</b>                                                                                                                                        |
|-----------------|-------------------------|-------------------------------------------------------------------------------------------------------------------------------------------------------------------------------------|
| BM              | Induction-1             | <i>Methicillin-resistant Staphylococcus aureus (MRSA)</i>                                                                                                                           |
| Combined BM/CNS | Induction-3             | <i>Clostridium septicum + Staphylococcus aureus</i>                                                                                                                                 |
| BM              | Induction-1             | <i>E.coli + Candida species (pneumonia / sepsis)</i>                                                                                                                                |
| CNS             | Intensification-2       | <i>Pseudomonas aeruginosa</i>                                                                                                                                                       |
| BM              | Induction-3             | <i>Rhizopus species</i>                                                                                                                                                             |
| BM              | Induction-1             | <i>MRSA + Candida Tropicalis</i>                                                                                                                                                    |
| BM              | Intensification-2       | <i>Influenza A (H1N1) + Aspergillus</i>                                                                                                                                             |
| BM              | Induction-1             | <i>Candida albicans</i>                                                                                                                                                             |
| BM              | Induction-3             | <i>Candida tropicalis</i>                                                                                                                                                           |
| BM              | Induction-1             | <i>Klebsiella oxytoca + Streptococcus species + Pseudomonas aeruginosa</i>                                                                                                          |
| BM              | Induction-1             | <i>Unknown organism (Pansinusitis / periorbital cellulitis / cavernous sinus thrombosis / internal carotid artery occlusion / multiple cerebral septic infarcts / otitis media)</i> |
| BM              | Intensification-2       | <i>Escherichia coli</i>                                                                                                                                                             |
| BM              | Intensification-2       | <i>Unknown organism (Multi-organ failure / sepsis)</i>                                                                                                                              |
| Combined BM/CNS | Induction-1             | <i>Rhizopus species (mucormycosis)</i>                                                                                                                                              |
| Combined BM/CNS | Induction-1             | <i>Streptococcus mitis + Aspergillus species</i>                                                                                                                                    |
| BM              | Intensification-2       | <i>Pseudomonas species (perirectal abscess / sepsis)</i>                                                                                                                            |
| BM              | Intensification-2       | <i>Pseudomonas aeruginosa</i>                                                                                                                                                       |
| Combined BM/CNS | Induction-1             | <i>Methicillin Resistant Staphylococcus Aureus</i>                                                                                                                                  |

BM: Bone Marrow

CNS: Central Nervous System
